# Supplementary material
Source: publisher site journal article supplement (https://www.dovepress.com/article/595863)
Supplement: Supplementary file 1 [file 595863%20Supplemental%20material.docx]

**Supplemental Material**

Supplemental Table 1: Investigators, Enrollment, and Treatment Summary

|  |  |  |  | **Enrolled Patients** | **Treated Patients** | | | | |
| --- | --- | --- | --- | --- | --- | --- | --- | --- | --- |
| **Site Name and Country** | **First/Last Enrollment** | **Ethics Committee Name and Approval Date** | **Principal Investigator** | **Overall** | **Cardiovascular Indication** | **Soft Tissue Indication** | **Solid Organ Indication** | **Other Indication** | **Overall** |
| Jena University Hospital - Friedrich Schiller University  Germany | 08JUN2023/ 18DEC2023 | Friedrich-Schiller University Jena Ethics Committee  30-MAR-2023 | Gloria Färber/ Tulio Caldonazo* | 18 | 14 | 0 | 0 | 0 | 14 |
|  |  |  | Total Germany | 18 | 14 | 0 | 0 | 0 | 14 |
| ZGT Hengelo  Netherlands | 25SEP2023/ 18JUL2024 | Central – METC-Z Zuyderland  Local – committee ZGT ALU  05-JUL-2023 | J.M.J. Botman | 40 | 40 | 0 | 0 | 0 | 40 |
|  |  |  | Total Netherlands | 40 | 40 | 0 | 0 | 0 | 40 |
| North Devon District Hospital - Northern Devon Healthcare NHS Trust  United Kingdom | 19SEP2023/ 04JUL2024 | South Central – Hampshire B Research Ethics Committee  07-NOV-2022 | John Findlay | 12 | 0 | 0 | 9 | 3 | 12 |
| Nottingham Queens Medical Center  United Kingdom | 16AUG2023/ 30APR2024 | South Central – Hampshire B Research Ethics Committee  07-NOV-2022 | Alex Navarro | 12 | 5 | 1 | 6 | 0 | 12 |
| The Leeds Teaching Hospitals NHS Trust - St James University Hospital  United Kingdom | 15JUN2023/ 05AUG2024 | South Central – Hampshire B Research Ethics Committee  07-NOV-2022 | Aaron Quyn | 30 | 2 | 17 | 3 | 6 | 28 |
|  |  |  | Total United Kingdom | 54 | 7 | 18 | 18 | 9 | 52 |
|  |  |  | Total | 112† | 61 | 18 | 18 | 9 | 106‡ |

*Gloria Färber, MD transitioned off the study in December 2023, and Tulio Caldonazo, MD took over PI responsibilities; †Of the 112 enrolled patients, 2 were enrolled, but Veriset was not used in the procedure, 4 were exited due to missing documentation; ‡Of the 106 treated patients, Veriset was used off-label in 6 patients, for a total of 100 patients in the final analysis of outcomes following on-label use of Veriset

**Supplemental Table 2. Primary Patient Diagnoses**

| **Primary Diagnosis, n (%)** | **Cardiovascular**  **Indication (n=56)** | **Soft-tissue Indication (n=18)** | **Solid-organ Indication (n=18)** | **Other Indication (n=8)** | **Overall (n=100)** |
| --- | --- | --- | --- | --- | --- |
|  | 56 | 18 | 18 | 8 | 100 |
| Acute occlusion leg right | 1 (1.8%) | 0 (0.0%) | 0 (0.0%) | 0 (0.0%) | 1 (1.0%) |
| Aneurysm | 2 (3.6%) | 0 (0.0%) | 0 (0.0%) | 0 (0.0%) | 2 (2.0%) |
| Aortic valve regurgitation | 1 (1.8%) | 0 (0.0%) | 0 (0.0%) | 0 (0.0%) | 1 (1.0%) |
| Aortic valve stenosis, mitral- and tricuspid valve regurgitation | 1 (1.8%) | 0 (0.0%) | 0 (0.0%) | 0 (0.0%) | 1 (1.0%) |
| Cardiomyopathy | 2 (3.6%) | 0 (0.0%) | 0 (0.0%) | 0 (0.0%) | 2 (2.0%) |
| Cholecystitis | 0 (0.0%) | 0 (0.0%) | 2 (11.1%) | 0 (0.0%) | 2 (2.0%) |
| Claudication | 1 (1.8%) | 0 (0.0%) | 0 (0.0%) | 0 (0.0%) | 1 (1.0%) |
| Colonic mass | 0 (0.0%) | 0 (0.0%) | 0 (0.0%) | 1 (12.5%) | 1 (1.0%) |
| Colorectal cancer | 2 (3.6%) | 14 (77.8%) | 4 (22.2%) | 5 (62.5%) | 25 (25.0%) |
| Coronary artery disease | 1 (1.8%) | 0 (0.0%) | 0 (0.0%) | 0 (0.0%) | 1 (1.0%) |
| Type 3 endoleak after endovascular aortic reconstruction | 1 (1.8%) | 0 (0.0%) | 0 (0.0%) | 0 (0.0%) | 1 (1.0%) |
| Gallstones | 0 (0.0%) | 0 (0.0%) | 4 (22.2%) | 1 (12.5%) | 5 (5.0%) |
| Hernia | 0 (0.0%) | 0 (0.0%) | 1 (5.6%) | 0 (0.0%) | 1 (1.0%) |
| Infection | 1 (1.8%) | 0 (0.0%) | 0 (0.0%) | 0 (0.0%) | 1 (1.0%) |
| Ischemia | 3 (5.4%) | 0 (0.0%) | 0 (0.0%) | 0 (0.0%) | 3 (3.0%) |
| Liver cancer | 0 (0.0%) | 0 (0.0%) | 4 (22.2%) | 0 (0.0%) | 4 (4.0%) |
| Mitral valve regurgitation | 3 (5.4%) | 0 (0.0%) | 0 (0.0%) | 0 (0.0%) | 3 (3.0%) |
| Occlusion | 9 (16.1%) | 0 (0.0%) | 0 (0.0%) | 0 (0.0%) | 9 (9.0%) |
| Pancreatic cancer | 0 (0.0%) | 1 (5.6%) | 0 (0.0%) | 0 (0.0%) | 1 (1.0%) |
| Perforated sigmoid diverticular disease | 0 (0.0%) | 0 (0.0%) | 1 (5.6%) | 0 (0.0%) | 1 (1.0%) |
| Peripheral arterial disease | 7 (12.5%) | 0 (0.0%) | 0 (0.0%) | 0 (0.0%) | 7 (7.0%) |
| Possible gallbladder malignancy | 0 (0.0%) | 0 (0.0%) | 1 (5.6%) | 0 (0.0%) | 1 (1.0%) |
| Previous Hartmann’s Procedure for Perforated Diverticulitis | 0 (0.0%) | 0 (0.0%) | 1 (5.6%) | 0 (0.0%) | 1 (1.0%) |
| Reconstruction of aorta | 1 (1.8%) | 0 (0.0%) | 0 (0.0%) | 0 (0.0%) | 1 (1.0%) |
| Rectal cancer | 0 (0.0%) | 3 (16.7%) | 0 (0.0%) | 1 (12.5%) | 4 (4.0%) |
| Stenosis | 19 (33.9%) | 0 (0.0%) | 0 (0.0%) | 0 (0.0%) | 19 (19.0%) |
| Stroke | 1 (1.8%) | 0 (0.0%) | 0 (0.0%) | 0 (0.0%) | 1 (1.0%) |

**Supplemental Table 3. Procedures Performed**

| **Procedure type reported** | **Number performed** |
| --- | --- |
| Arterial/venous procedures | 38 |
| Abdominoperineal resection | 19 |
| Lymphadenectomy | 15 |
| Small bowel resection | 13 |
| Cardiac valve repair | 12 |
| Radical cystectomy with urinary diversion | 12 |
| Pelvic exenteration | 11 |
| Cholecystectomy | 10 |
| Abdominal aortic aneurysm repair | 6 |
| Liver resection | 6 |
| Radical prostatectomy | 4 |
| Vaginectomy | 4 |
| Ablation | 3 |
| Aortic valve replacement | 3 |
| Lower anterior resection | 3 |
| Oophorectomy | 3 |
| Radical hysterectomy | 3 |
| Abdominal wall reconstruction | 2 |
| Adnexectomy | 2 |
| Coronary artery bypass graft | 2 |
| Flap surgery | 2 |
| Hartmann’s reversal | 2 |
| Lysis of adhesions | 2 |
| Right hemicolectomy | 2 |
| Abdominal aortic aneurysm | 1 |
| Adhesiolysis | 1 |
| Heart transplant | 1 |
| Parastomal hernia | 1 |
| Pelvic sidewall lymphadenectomy | 1 |
| Posterior exenteration & en-bloc sacrectomy | 1 |
| Proctocolectomy | 1 |
| Right hemicolectomy and anastomosis | 1 |
| Sacrectomy | 1 |
| Salpingectomy | 1 |
| Total hysterectomy | 1 |
| Ureteral reimplantation | 1 |

**Supplemental Table 4. Summary of Adverse Events**

| **MedDRA Preferred Term Level*** | **Overall**  **N = 100 subjects** |
| --- | --- |
| **Serious Adverse Events** | |
| Post procedural infection | 2.0% (2/100) [2] |
| Postoperative wound infection | 2.0% (2/100) [2] |
| Sepsis | 1.0% (1/100) [1] |
| Urinary tract infection | 1.0% (1/100) [1] |
| Anemia postoperative | 4.0% (4/100) [4] |
| Anastomotic leak | 1.0% (1/100) [1] |
| Gastrointestinal anastomotic leak | 2.0% (2/100) [2] |
| Post procedural complication | 2.0% (2/100) [2] |
| Post procedural hemorrhage | 2.0% (2/100) [3] |
| Post procedural urine leak | 2.0% (2/100) [2] |
| Postoperative ileus | 2.0% (2/100) [2] |
| Procedural hemorrhage | 26.0% (26/100) [26] |
| Procedural pain | 1.0% (1/100) [1] |
| Urinary retention | 1.0% (1/100) [1] |
| Pelvic fluid collection | 3.0% (3/100) [3] |
| Pulmonary embolism | 1.0% (1/100) [1] |
| Iliac artery occlusion | 1.0% (1/100) [1] |
| **Non-serious Adverse Events** | |
| Spleen disorder | 1.0% (1/100) [1] |
| Localized infection | 1.0% (1/100) [1] |
| Postoperative delirium | 1.0% (1/100) [1] |
| Procedural hemorrhage | 1.0% (1/100) [1] |
| Wound dehiscence | 2.0% (2/100) [2] |

*Terms reported based on Medical Dictionary for Regulatory Activities (MedDRA) version 26.0; site-reported data presented as % patients (No. patients/N) [number of adverse events]; 61 adverse events reported in 38 patients (patients may have had more than 1 adverse event); 60 adverse events were reported as related to the procedure only and 1 as related to the device and/or the procedure

Supplemental Table 5. Details on Bleeding Sites Requiring Rescue Therapy

| **Indication Type** | **Primary Diagnosis*** | **No. of bleeding sites** | **Bleeding severity grade** | **Source of bleeding** | **Hemostasis achieved within 5 min** |
| --- | --- | --- | --- | --- | --- |
| Solid organ | Anal squamous cell carcinoma | 3 | 2 | Venous | Yes |
| Soft tissue | Advanced rectal cancer | 3 | 3 | Arterial, Venous | No |
| Solid organ | Anal squamous cell carcinoma | 3 | 3 | Venous | Yes |
| Soft tissue | Rectal cancer - recurrence | 1 | 3 | Dorsal Venous Complex | Yes |

*All procedures recorded as a general lower abdominal procedure involving pelvic exenteration or exenteration.
